# Supplementary material
Source: publisher figshare collection journal article supplement (https://asha.figshare.com/articles/dataset/_/13250180)
Supplement: Supplementary file 1 [file 2]

**Supplemental Material S1.** Groups of children with and without SRT data (demographic features and means and standard deviations on participant selection measures).

| Variable                | SRT <sub>AV</sub> , <i>n</i> = 79 |           |          | SRT <sub>N/A</sub> , <i>n</i> = 25 |           |          | Comparison of means |          |
|-------------------------|-----------------------------------|-----------|----------|------------------------------------|-----------|----------|---------------------|----------|
|                         | <i>M</i>                          | <i>SD</i> | <i>R</i> | <i>M</i>                           | <i>SD</i> | <i>R</i> | <i>t</i>            | <i>p</i> |
| Age in months           | 82.89                             | 7.70      | 70–104   | 82.36                              | 7.53      | 72–96    | 0.30                | .765     |
| CLS <sup>a</sup>        | 84.39                             | 22.27     | 40–134   | 80.36                              | 21.16     |          | 0.80                | .427     |
| PTONI <sup>a</sup>      | 95.43                             | 19.41     | 70–141   | 95.56                              | 17.37     |          | –0.03               | .976     |
| NWR                     | 81.47                             | 11.61     |          | 81.47                              | 13.25     |          | 0.00                | .999     |
| DR <sup>a</sup>         | 94.62                             | 18.59     |          | 91.20                              | 18.83     |          | 0.80                | .426     |
| BDR <sup>a</sup>        | 86.80                             | 18.74     |          | 79.92                              | 15.91     |          | 1.66                | .101     |
| BDR <sup>a</sup>        | 90.77                             | 19.97     |          | 93.32                              | 15.69     |          | –0.58               | .562     |
| General WM <sup>b</sup> | 0.04                              | 1.02      |          | –0.12                              | 0.94      |          | 0.69                | .491     |

*Note.* SRT<sub>AV</sub> = children for whom SRT data was available; SRT<sub>N/A</sub> = children for whom SRT data was unavailable; CLS = Core Language Score on the CELF-IV; PTONI = Primary Test of Nonverbal Intelligence; NWR = nonword repetition (percentage of phonemes correct score); DR = digit recall; BDR = backwards digit recall; *t* = independent samples *t*-test statistic.

<sup>a</sup>Standard scores are provided (tests standardised to a mean of 100 and standard deviation of 15).

<sup>b</sup>General working memory factor created through factor analysis of four working memory subtests (Nonword Repetition, Digit Recall, Backwards Digit Recall, Block Recall).
