# Supplementary material
Source: publisher figshare collection journal article supplement (https://asha.figshare.com/articles/dataset/_/13250180)
Supplement: Supplementary file 2 [file 2]

**Supplemental Material S2.** Results of bivariate correlations between all variables.

| Variable                                      | 1    | 2     | 3     | 4     | 5     | 6     | 7     | 8     | 9     | 10    | 11    | 12    | 13    | 14    | 15   | 16  | 17 |
|-----------------------------------------------|------|-------|-------|-------|-------|-------|-------|-------|-------|-------|-------|-------|-------|-------|------|-----|----|
| 1. Age (months)                               | —    |       |       |       |       |       |       |       |       |       |       |       |       |       |      |     |    |
| 2. Gender <sup>a</sup>                        | .12  | —     |       |       |       |       |       |       |       |       |       |       |       |       |      |     |    |
| 3. Nonverbal IQ                               | -.15 | .05   | —     |       |       |       |       |       |       |       |       |       |       |       |      |     |    |
| 4. General language                           | -.15 | -.21* | .47** | —     |       |       |       |       |       |       |       |       |       |       |      |     |    |
| 5. Nonword repetition (PPC)                   | .07  | -.07  | .36** | .78** | —     |       |       |       |       |       |       |       |       |       |      |     |    |
| 6. Digit span                                 | -.15 | .01   | .24*  | .62** | .61** | —     |       |       |       |       |       |       |       |       |      |     |    |
| 7. Block recall                               | -.16 | .13   | .18   | .36** | .26** | .40** | —     |       |       |       |       |       |       |       |      |     |    |
| 8. Backward digit span                        | -.10 | -.08  | .36** | .69** | .61** | .52** | .33** | —     |       |       |       |       |       |       |      |     |    |
| 9. DL Learning                                | -.07 | .03   | .31** | .28** | .17   | .17   | .16   | .26** | —     |       |       |       |       |       |      |     |    |
| 10. DL Total                                  | -.07 | .06   | .31** | .28*  | .18   | .16   | .16   | .25** | .94** | —     |       |       |       |       |      |     |    |
| 11. DL Long Delay                             | -.06 | .19   | .27** | .27** | .22** | .33** | .21*  | .26** | .69** | .70** | —     |       |       |       |      |     |    |
| 12. WP Learning                               | .02  | .03   | .29** | .34** | .33** | .29** | .14   | .29** | .27** | .26** | .34** | —     |       |       |      |     |    |
| 13. WP Total                                  | -.12 | .03   | .37** | .46** | .39** | .36** | .20*  | .39** | .33** | .33** | .39** | .94** | —     |       |      |     |    |
| 14. WP Long Delay                             | -.04 | -.15  | .31** | .43** | .28** | .39** | .34** | .37** | .34** | .32** | .38** | .54** | .59** | —     |      |     |    |
| 15. WP Del Recognition                        | .02  | -.05  | .44** | .64** | .59** | .38** | .20*  | .66** | .34** | .36** | .37** | .42** | .51** | .43** | —    |     |    |
| 16. Deterministic <i>t</i> -test <sup>b</sup> | .01  | -.08  | .23*  | .35*  | .35*  | .36*  | .30*  | .22   | .16   | .10   | .19   | .04   | .12   | .13   | .32* | —   |    |
| 17. Probabilistic <i>t</i> -test              | .11  | .02   | -.17  | .01   | .06   | -.03  | -.06  | .06   | .10   | .12   | .05   | .08   | .06   | .06   | .07  | .14 | —  |

*Note.* Values reported are Pearson's correlation coefficients (*r*). All values reported are standard scores, unless otherwise stated. PPC = percentage of phonemes correct; DL = Dot Locations (Cohen, 1997); WP = Word Pairs (Cohen, 1997).

<sup>a</sup>Point-biserial correlation used to determine the strength of a linear relationship between continuous variable and nominal variable with two categories (i.e., gender).

<sup>b</sup>Spearman's rho correlation used due to violations in the assumption of normality, linearity, or homoscedasticity.

\**p* < .05. \*\**p* < .001.
