# Supplementary material
Source: publisher figshare collection journal article supplement (https://asha.figshare.com/articles/dataset/_/13250180)
Supplement: Supplementary file 3 [file 2]

**Supplemental Material S3.** Covariate factors in MANCOVAs for working, declarative, and procedural memory analyses.

| <b>Memory system</b>      | <b>Adjusting for</b> | <b>Wilks' Lambda</b> | <b><i>F</i></b> | <b><i>p</i></b> | <b><i>partial η</i><sup>2</sup></b> | <b>Observed power</b> |
|---------------------------|----------------------|----------------------|-----------------|-----------------|-------------------------------------|-----------------------|
| Working memory            | Nonverbal IQ         | 0.93                 | 1.92            | .114            | 0.07                                | 0.56                  |
| Procedural Memory         | Nonverbal IQ         | 0.89                 | 4.50            | .014            | 0.11                                | 0.75                  |
|                           | General WM           | 0.96                 | 1.63            | .203            | 0.04                                | 0.33                  |
| Verbal declarative memory | Nonverbal IQ         | 0.88                 | 3.32            | .014            | 0.12                                | 0.83                  |
|                           | Verbal ST/WM         | 0.77                 | 7.46            | < .001          | 0.23                                | 0.99                  |
| Visual declarative memory | Nonverbal IQ         | 0.90                 | 3.75            | .013            | 0.10                                | 0.80                  |

*Note.* General WM = General working memory factor created through factor analysis of four working memory subtests; Verbal ST/WM = Verbal short-term and working memory factor created through factor analysis of three individual subtest scores (Nonword Repetition, Digit Recall, and Backwards Digit Recall).
